1 METAGENOMIC SEQUENCING FOR COMBINED DETECTION OF RNA AND DNA  
2 VIRUSES IN RESPIRATORY SAMPLES FROM PAEDIATRIC PATIENTS

3

4 Sander van Boheemen<sup>a\*^</sup>, Anneloes L. van Rijn-Klink<sup>a\*</sup>, Nikos Pappas<sup>b</sup>, Ellen C. Carbo<sup>a</sup>,  
5 Ruben H.P. Vorderman<sup>b</sup>, Peter J. van 't Hof<sup>b</sup>, Hailiang Mei<sup>b</sup>, Eric C.J. Claas<sup>a</sup>, Aloys C.M.  
6 Kroes<sup>a\$</sup>, Jutte J.C. de Vries<sup>a\$#</sup>

7

8 <sup>a</sup>Department of Medical Microbiology,

9 Leiden University Medical Center, Leiden, The Netherlands

10 <sup>b</sup> Sequencing Analysis Support Core, Department of Biomedical Data Sciences,

11 Leiden University Medical Center, Leiden, The Netherlands

12

13 Running title: metagenomic sequencing for pan-viral detection

14

15 \* These authors contributed equally to this work

16 \$ These authors contributed equally to this work

17 ^ Present address: Sander van Boheemen, Department of clinical virology, Erasmus medical  
18 Center, Rotterdam, The Netherlands

19 # Correspondence address: [jjcdevries@lumc.nl](mailto:jjcdevries@lumc.nl)

20

21 Keywords: metagenomics, mNGS, sequencing, pan-viral, virus, respiratory

## 22 **ABSTRACT**

### 23 Introduction

24 Viruses are the main cause of respiratory tract infections. Metagenomic next-generation  
25 sequencing (mNGS) enables the unbiased detection of all potential pathogens in a clinical  
26 sample, including variants and even unknown pathogens. To apply mNGS in viral  
27 diagnostics, there is a need for sensitive and simultaneous detection of RNA and DNA  
28 viruses. In this study, the performance of an in-house mNGS protocol for routine diagnostics  
29 of viral respiratory infections, with single tube DNA and RNA sample-pre-treatment and  
30 potential for automated pan-pathogen detection was studied.

31

### 32 Materials and Methods

33 The sequencing protocol and bioinformatics analysis was designed and optimized including  
34 the optimal concentration of the spike-in internal controls equine arteritis virus (EAV) and  
35 phocine-herpes virus-1 (PhHV-1). The whole genome of PhHV-1 was sequenced and added to  
36 the NCBI database. Subsequently, the protocol was retrospectively validated using a selection  
37 of 25 respiratory samples with in total 29 positive and 346 negative PCR results, previously  
38 sent to the lab for routine diagnostics.

39

### 40 Results

41 The results demonstrated that our protocol using Illumina Nextseq 500 sequencing with 10  
42 million reads showed high repeatability. The NCBI RefSeq database as opposed to the NCBI  
43 nucleotide database led to enhanced specificity of virus classification. A correlation was  
44 established between read counts and PCR cycle threshold value, demonstrating the semi-  
45 quantitative nature of viral detection by mNGS. The results as obtained by mNGS appeared  
46 concordant with PCR based diagnostics in 25 out of the 29 (86%) respiratory viruses positive  
47 by PCR and in 315 of 346 (91%) PCR-negative results. Viral pathogens only detected by

48 mNGS, not present in the routine diagnostic workflow were influenza C, KI polyomavirus,  
49 and cytomegalovirus.

50

51 Conclusions

52 Sensitivity and analytical specificity of this mNGS protocol was comparable with PCR and  
53 higher when considering off-PCR target viral pathogens. All potential viral pathogens were  
54 detected in one single test, while it simultaneously obtained detailed information on detected  
55 viruses.

56

## 57 INTRODUCTION

58 Respiratory tract infections pose a great burden on public health, causing extensive morbidity  
59 and mortality among patients worldwide [1-3]. The majority of acute respiratory infections is  
60 caused by viruses, such as rhinovirus (RV), influenza (INF) A and B viruses,  
61 metapneumovirus (MPV), and respiratory syncytial virus (RSV) [4]. However, in 20-62% of  
62 the patients, no pathogen is detected [4-6]. This might be the result of diagnostic failures or  
63 even infection by unknown pathogens, such as the Middle East respiratory syndrome  
64 coronavirus (MERS-CoV), that was first recognized in 2012 [7].

65 Rapid identification of the respiratory pathogen is critical to determine downstream decision-  
66 making such as isolation measures or treatment, including cessation of antibiotic therapy.  
67 Current diagnostic amplification methods as real-time polymerase chain reaction (qPCR) are  
68 very sensitive and specific, but are aiming at particular virus species or types. Genetic  
69 diversity within the virus genome and the sheer number of potential pathogens in many  
70 clinical conditions pose limitations to predefined primer and probe based approaches, leading  
71 to false negative results [8]. These limitations, combined with the potential emergence of new  
72 or unusual pathogens highlight the need for less restricted approaches that could improve the  
73 diagnosis and subsequent outbreak management of infectious diseases.

74 Metagenomics relates to the study of the complete genomic content in a complex mixture of  
75 (micro)organisms [9]. Unlike bacteria, viruses do not display a common gene in all virus  
76 families, and therefore pan-virus detection relies on catch-all analytic methods.

77 Metagenomics or untargeted next-generation sequencing (mNGS) offers a culture and  
78 nucleotide-sequence-independent method that eliminates the need to define the targets for  
79 diagnosis beforehand. Besides primary detection, mNGS immediately offers additional  
80 information, on virulence markers, epidemiology, genotyping, and evolution of pathogens [7,  
81 10-12]. Furthermore, quantitative assessment of the presence of virus copies in the sample is  
82 enabled by the number reads [8].

83 While original mNGS studies typically aim at analysis of (shifts in) population diversity of  
84 abundant DNA microbes, detection of viral pathogens in patient samples requires a different  
85 technical approach because of 1) the very low abundance of viral pathogens (<1%) in clinical  
86 samples and 2) the requisite of detection of both DNA and RNA viruses. Hence, a low limit  
87 of detection for RNA and DNA in one single assay is essential for implementation of mNGS  
88 for routine pathogen detection in clinical diagnostic laboratories. Current viral mNGS  
89 protocols are optimized for either RNA or DNA detection [11, 13-15]. Consequently,  
90 detection of both RNA and DNA viruses requires parallel work-up of both RNA and DNA  
91 pre-treatment methods. Additionally, to increase the relative concentration of viral sequences,  
92 viral particle enrichment techniques are often applied [8, 12]. These techniques are laborious  
93 and not easily automated for routine clinical diagnostic use. Moreover, during enrichment  
94 directed at viral particles, intracellular viral nucleic acids as genomes and mRNAs are being  
95 discarded. Following sequencing, the bioinformatics classification and interpretation of the  
96 results remain a major challenge. Bioinformatic classifiers are often developed for usage in  
97 either microbiome studies or classification of high abundant reads whereas extensive  
98 validation for clinical diagnostic usage in settings of very low abundance is very limited.  
99 After bioinformatics classification, the challenge remains to discriminate between viruses that  
100 play a role in aetiology and bona fide viruses [16]. Before mNGS might be considered in  
101 routine diagnostics, there is a need for critical evaluation and validation of every step in the  
102 procedure.

103 In this study, we evaluated a metagenomic protocol for NGS-based pathogen detection with  
104 sample pre-treatment for DNA and RNA in a single tube. The method was validated using a  
105 selection of 25 respiratory paediatric samples with in total 29 positive and 346 negative viral  
106 PCR results. The main study objective was to define a sensitive and specific method for  
107 mNGS to be used as a broad diagnostic tool for viral respiratory diseases with the potency for  
108 automated pan-pathogen detection.

## 109 MATERIAL AND METHODS

110

### 111 Sample selection

112 Twenty-five stored clinical respiratory samples (-80 °C) from paediatric patients, sent to the  
113 microbiological laboratory for routine viral diagnostics in 2016, were selected from the  
114 laboratory database (GLIMS, MIPS, Belgium) at the Leiden University Medical Center  
115 (LUMC). The selection was based on respiratory virus PCR test results: 21 out of the 25  
116 samples had one or more positive PCR result, with a variety of respiratory viruses and a wide  
117 range of quantification cycle (Cq) values. The lab-developed real-time multiplex PCR  
118 method used was an updated version of the assay previously described by Loens et al [17].  
119 The sample types represented the routine diagnostic samples from paediatric patients sent to  
120 our laboratory: predominantly nasopharyngeal washings (n=17), sputum (n=2) and broncho-  
121 alveolar lavages (BAL, n=2). The patient selection (age range 1.2 months – 15 years)  
122 represented the paediatric population with respiratory diagnostics in our university hospital in  
123 terms of (underlying) illness.

124

### 125 Sample pre-treatment

126 A sample pre-treatment protocol was designed with 1) potential for automation, 2) potential  
127 for pan-pathogen detection and 3) detection of intracellular viral nucleic acids. Consequently,  
128 any type of viral enrichment steps were excluded (filtration, centrifugation, nucleases, rRNA  
129 removal). Total nucleic acids (NA) were extracted directly from 200 ul of clinical material,  
130 using the MagNAPure 96 DNA and Viral NA Small Volume Kit (Roche Diagnostics,  
131 Almere, the Netherlands) with 100 µL output eluate.

132

### 133 Internal controls

134 Clinical material was spiked with equine arteritis virus (EAV) and phocine herpesvirus 1  
135 (PhHV1, kindly provided by prof. dr. H.G.M. Niesters, the Netherlands) as internal controls  
136 for RNA and DNA virus detection respectively. To determine the optimal concentration of  
137 the internal controls a dilution series was added to a mix of two pooled influenza A positive  
138 throat swabs (Cq 25) (PhHV1/EAV 1:100,000 1:10,000 1:1,000 1:100). Concentration was  
139 based on the number of mNGS reads (Centrifuge output as well as BLAST) in order to serve  
140 as control [19].

141

#### 142 **Quality control**

143 Before sequencing the DNA input concentration was measured with the Qubit (ThermoFisher  
144 Scientific, Waltham, USA), to determine whether there was sufficient DNA in the sample to  
145 obtain sequencing results. The range of DNA input for library preparation was 0.5 ng/μl for  
146 throat swabs (see reproducibility experiment) up to 300 ng/μl for bronchoalveolar lavages  
147 and sputa.

148

#### 149 **Fragmentation**

150 To compare the effect of different DNA fragmentation techniques, ten samples were 1)  
151 chemically fragmented using zinc (10 min.) and 2) physically fragmented using sonication  
152 with the Bioruptor<sup>®</sup> pico (Diagenode, Seraing, Belgium, on/off time: 18/30s, 5 cycli) [20].  
153 Three samples were also tested with the 3) high intensity settings of the Bioruptor<sup>®</sup> pico  
154 (on/off time: 30/40s, 14 cycli).

155

#### 156 **Library preparation**

157 Libraries were constructed with 7µL extracted nucleic acids using the NEBNext® Ultra™  
158 Directional RNA Library Prep Kit for Illumina® [21] using single, unique adaptors. This kit  
159 has been developed for transcriptome analyses. We made several adaptations to the  
160 manufacturers protocol in order to enable simultaneous detection of both DNA and RNA  
161 viruses: the following steps were omitted: Poly A mRNA capture isolation (Instruction  
162 manual NEB #E7420S/L, version 8.0, Chapter 1), rRNA depletion and DNase step (Chapter  
163 2.1-2.4, 2.5B, 2.11A).

164 The size of fragments in the library was 300-700 bp. Adaptors were diluted 30 fold given the  
165 low RNA/DNA input and 21 PCR cycles were run post-adaptor ligation.

166

#### 167 **Nucleotide Sequence Analysis**

168 Sequencing was performed on Illumina HiSeq 4000 and NextSeq 500 sequencing systems  
169 (Illumina, San Diego, CA, USA), obtaining 10 million 150 bp paired-end reads per sample.

170

#### 171 **Detection limit**

172 To determine the detection limit of mNGS, serial dilutions (undiluted,  $10^{-1}$ ,  $10^{-2}$ ,  $10^{-3}$ ,  $10^{-4}$ ) of  
173 an influenza A positive sample was tested with both lab developed real-time PCR and  
174 mNGS.

175

#### 176 **Repeatability (within run precision)**

177 To determine the reproducibility of metagenomic sequencing an influenza A positive clinical  
178 sample (throat swab) was tested in quadruple. This sample was divided into separate aliquots,  
179 nucleic acids were extracted, library preparation and subsequent sequence analysis on the  
180 Illumina HiSeq 4000 was performed in one run.



181

182 **Bioinformatics: taxonomic classification**

183 All FASTQ files were processed using the BIOPET Gears pipeline version 0.9.0 developed at  
184 the LUMC [22]. This pipeline performs FASTQ pre-processing (including quality control,  
185 quality trimming and adapter clipping) and taxonomic classification of sequencing reads. In  
186 this project, FastQC version 0.11.2 [23] was used for checking the quality of the raw reads.  
187 Low quality read trimming was done using Sickle [24] version 1.33 with default settings.  
188 Adapter clipping was performed using Cutadapt [25] version 1.10 with default settings.  
189 Taxonomic classification of reads was performed with Centrifuge [26] version 1.0.1-beta.  
190 The pre-built NT index, which contains all sequences from NCBI's nucleotide database,  
191 provided by the Centrifuge developers was used  
192 (<ftp://ftp.ccb.jhu.edu/pub/infphilo/centrifuge/data/nt.tar.gz>) as the reference database.

193 In addition, a customized reference centrifuge index with sequence information obtained  
194 from the NCBI's RefSeq [27] (accessed November 2017) database was built. RefSeq  
195 genomic sequences for the domains of bacteria, viruses, archaea, fungi, protozoa, as well as  
196 the human reference, along with the taxonomy identifiers, were downloaded with the  
197 Centrifuge-download utility and were used as input for centrifuge-build.

198 Centrifuge settings were evaluated to increase the sensitivity and specificity. The default  
199 setting, with which a read can be assigned to up to five different taxonomic categories, was  
200 compared to one unique assignment per read [26] where a read is assigned to a single  
201 taxonomic category, corresponding to the lowest common ancestor of all matching species.

202 Kraken-style reports with taxonomical information were produced by the Centrifuge-kreport  
203 utility for all (default) options. Both unique and non-unique assignments can be reported, and  
204 these settings were compared. The resulting tree-like structured, Kraken-style reports were  
205 visualized with Krona [28] version 2.0.

206 In silico simulated EAV reads were analysed in different databases (NCBI nucleotide vs  
207 RefSeq), classification algorithms (max 5 labels per sequence, vs unique (common ancestor))  
208 and reporting (non-unique vs unique) to determine the most sensitive and specific  
209 bioinformatic analyses using Centrifuge.

210 To determine the amount of reads needed, results of 1 and 10 million reads were compared. 1  
211 million reads were randomly selected of the 10 million reads of one FASTQ file and  
212 analysed.

213

#### 214 **Bioinformatics: assembly of PhHV1 sequences**

215 Assembly of PhHV1 was done using the bowdl virus-assembly pipeline 0.1 [29]. The QC  
216 part of the bowdl pipeline determines which adapters need to be clipped by using FastQC  
217 version 0.11.7 [23] and cutadapt version 1.16 [25], with minimum length setting “1”. The  
218 resulting reads were downsampled within bowdl to 250 000 reads using seqtk 1.2 [30] after  
219 which SPADES version 3.11.1 [31] was run to get the first proposed genome contigs.

220 To retrieve longer assembly contigs a reiterative assembly approach was used by processing  
221 the proposed contigs by the bowdl reAssembly pipeline 0.1. This preassembly pipeline  
222 aligns reads to contigs of a previous assembly, then selects the aligned reads, downsamples  
223 them and runs a new assembly using SPADES. Subtools used for this consisted of BWA  
224 0.7.17 [32] for indexing and mapping, SAMtools 1.6 [33] for creating bam files, SAMtools  
225 view (version 1.7) for filtering out unmapped reads using the setting “-G 12”, Picard  
226 SamToFastq (version 2.18.4) and seqtk for creating fastq files with 250 000 reads. The  
227 contigs from the reAssembly pipeline were then processed for a second using SPADES, with  
228 setting the ‘cov-cutoff’ to 5. The resulting contigs were then processed with the reAssembly  
229 pipeline for the third and last time setting the ‘cov-cutoff’ in SPADES to 20.

230 The contigs from the last reAssembly step were then run against the blast NT database using  
231 blastn 2.7.1 [19] Out of 23 contigs only 5 contigs, that showed the lowest % in identity  
232 matches with any other possible non herpes virus species, were selected. The final 5 contigs  
233 contained sequence lengths of 97893, 8170 3710, 3294 and 1279 nucleotides, the average  
234 coverage was 206, 131, 211, 285 and 154, respectively. These five contigs were published as  
235 partial genome under accession number (NCBI accession number: MH509440)

236

### 237 **Retrospective validation**

238 Sensitivity and specificity of the metagenomic NGS procedure was compared with the lab  
239 developed multiplex qPCR [17] using a selection of 21 samples positive for at least one  
240 respiratory PCR target and 4 negative samples.. The routine multiplex PCR panel consisted  
241 of 15 respiratory target pathogens: influenza virus A/ B, respiratory syncytial virus (RSV),  
242 metapneumovirus (MPV), adenovirus (ADV), human bocavirus (HBoV), parainfluenza  
243 viruses (PIV) 1/ 2/ 3/ 4, rhinovirus (RV), and the coronaviruses HKU1, NL63, 227E and  
244 OC43. Thus, in total 375 PCR results were available (15 targets x 25 samples) of which 29  
245 PCR positive and 346 PCR negative for comparison with mNGS. Validation samples were  
246 tested with mNGS, using the total NA extraction protocol, the adapted NEBNext library  
247 preparation protocol, and sequencing 10 million reads on an Illumina NextSeq 500.  
248 Bioinformatics analyses was performed using Centrifuge with the RefSeq database and  
249 unique assignment of sequence reads.

250

### 251 **Ethical approval of patient studies**

252 The study design was approved by the medical ethics review committee of the Leiden  
253 University Medical Center.

254

## 255 **RESULTS**

256

### 257 **Internal controls**

258 Serial dilutions of EAV and PhHV1 were added to an influenza A PCR positive sample.

259 Serial dilution 1:10,000 detected EAV with a substantial read count in the presence of a viral

260 infection and without a significant decline in target virus family reads (Table 1). Based on

261 these results we determined the concentration of internal controls for further experiments.

262 The EAV C<sub>q</sub> value of the dilutions correlated with the number of EAV reads from both

263 BLAST alignment and the Centrifuge analysis (Figure 1).

264 Since the NCBI database was lacking a complete PhHV1 genome sequence, PhHV1 was

265 sequenced and based on the gained sequence reads the genome was build using SPAdes [31].

266 The proposed almost complete genome of PhHV1 was added to the NCBI genbank database

267 (submission ID 2124975, GenBank MH509440, release date 4 Dec 2018) and used for

268 BLAST alignment.

269

### 270 **Fragmentation**

271 The comparison of fragmentation methods for a selection of the samples with relevant target

272 reads, is shown in Figure 2. Root reads were comparable among the three protocols. The

273 protocol with fragmentation with Zinc had higher yield in target virus reads for all RNA

274 viruses tested and adenovirus.

275

### 276 **Index hopping**

277 Sequence analysis by Illumina HiSeq 4000 with single, unique indexes resulted in HRV-C

278 sequences (22-159 reads), in all samples run on the same lane, in contrast to samples run on

279 another lane. Comparison of HRV-C sequences between these samples resulted in an exact  
280 match. Retesting of these samples with Illumina Nextseq 500 resulted in disappearance of  
281 HRV reads in the samples, with the exception of a few HRV PCR positive samples (Figure  
282 3). Combined, this was highly suggestive for index hopping at the Illumina HiSeq 4000 [34].

283

#### 284 **Detection limit**

285 The detection limit, deduced from serial dilutions of EAV (Figure 1) and influenza A (Figure  
286 4) was comparable with a real time PCR C<sub>q</sub> value of approximately 35.

287

#### 288 **Repeatability: within run precision**

289 The mNGS results of an influenza A positive sample tested in quadruple could be reproduced  
290 with only minor differences (table 1): coefficient of variation of 1.2%: 0.05 log SD/ 4.0 log  
291 average.

292

#### 293 **Bioinformatics: taxonomic classification**

294 The Centrifuge default settings, with the NCBI nucleotide database and maximum 5 labels  
295 per sequence, resulted in various spurious classifications (Figure 5), for example Lassa virus  
296 (Figure 6), evidently highly unlikely to be present in patient samples from the Netherlands  
297 with respiratory complaints. The specificity could be increased by using the NCBI RefSeq  
298 database instead of the nucleotide database. The classification was further improved by  
299 changing the Centrifuge tool settings to limit the assignment of homologous reads to the  
300 lowest common ancestor (maximum 1 label per sequence). Classification with maximum 5  
301 labels per read resulted in two different outcomes using the report with all mappings and the

302 report with unique mappings, with the latter missing the reads assigned to multiple  
303 organisms.

304 Comparison of classification using these different settings shows the highest sensitivity and  
305 specificity using the RefSeq database with one label (lowest common ancestor) assignment,  
306 both with in silico prepared datasets containing solely EAV sequence fragments (Figure 5)  
307 and with clinical datasets (with highly abundant background) (Figure 6).

308 To determine the effect of the total number of sequencing reads obtained per sample on  
309 sensitivity, one million and 10 million reads were compared by means of in silico analysis  
310 (Table 2).

311

## 312 **Retrospective validation**

### 313 **Clinical sensitivity based on PCR target pathogens**

314 The sample collection consisted of 21 clinical specimens positive for at least one of the  
315 following PCR target viruses: rhinovirus, influenza A&B, parainfluenza 1 &4 (PIV),  
316 metapneumovirus, respiratory syncytial virus, coronaviruses NL63 and HKU1 (CoV), human  
317 bocavirus (hBoV), and adenovirus (ADV). Fourteen samples were positive for one virus, six  
318 samples for two and one sample for three viruses with the lab-developed respiratory  
319 multiplex qPCR. Cq values ranged from Cq 17 to Cq 35, with a median of 23.

320 With mNGS 25 of the 29 viruses demonstrated in routine diagnostics were detected (Table  
321 3), resulting in a sensitivity of 86% for PCR targets. If a cut-off of 15 reads was handled,  
322 sensitivity declined to 67% (Table 4).

323 mNGS target read count showed a correlation with the Cq values of the qPCR (Figure 7).

324

325

### 326 **Detection of additional viral pathogens by mNGS: off-PCR target viruses**

327 Next to the viral pathogens tested by PCR, mNGS also detected other pathogenic viruses,  
328 indicating additional viral sequences uncovered by mNGS but not included in the routine  
329 diagnostics, with influenza C virus being the most prominent. A high amount, 4800 reads, of  
330 influenza virus C reads (C/Ann Arbor/1/50) (88% of all viral reads and 0.02 of the total reads)  
331 was found in one sample. Other potential respiratory pathogens detected by mNGS and not  
332 included in PCR analysis were KI polyomavirus (2 samples: 159 and 30 reads respectively),  
333 cytomegalovirus (human betaherpesvirus 5) (1704 and 132 reads). All of these viruses are  
334 not included routinely in the diagnostic multiplex qPCRs.

335

### 336 **Internal controls**

337 The spiked-in internal controls were detected by mNGS in all samples. EAV sequence reads  
338 ranged from 18-34660 (median 538) and herpesviridae reads as indicator of PhHV1 ranged  
339 from 1-1707 (median 23).

340

### 341 **Analytical specificity based on PCR target viruses**

342 In total 25 paediatric respiratory samples were available for analysis of analytical specificity  
343 of mNGS: 4 samples were negative for all 15 viral pathogens in the multiplex PCR panel  
344 (influenza A/B, RSV, HMPV, ADV, HBoV, PIV1/2/3/4, RV, HKU1, NL63, 227E, OC43)  
345 and 21 samples were negative for 12-14 of these PCR target pathogens.

346 Out of in total 346 negative target PCR results of these 25 samples, 315 results corresponded  
347 with the finding of 0 target specific reads by mNGS. If a cut-off of 15 reads was used 343 of  
348 the 346 negative PCR targets were negative with mNGS. The 3 samples positive by mNGS  
349 and negative by PCR were human parainfluenzavirus 1 (27 reads), 3 (31 reads), and 4 (27  
350 reads). Though no conclusive proof for neither true positive or false mNGS results could be

351 found, specificity of mNGS was 91% (315/346) when encountering all reads and  $\geq 99\%$   
352 (343/346) with a 15 reads cut-off (Table 6).

353

#### 354 **Drug resistance data**

355 Using the sequence data we identified several mutations on the genome of two clinical  
356 samples tested positive for influenza A virus. None of these mutations conferred resistance to  
357 either oseltamivir or zanamivir. For the positions where resistance associated mutations  
358 occur, amino acids I117, E119, D198, I222, H274, R292, N294 and I314 showed  
359 susceptibility to oseltamivir and V116, R118, E119, Q136, D151, R152, R224, E276, R292  
360 and R371 revealed susceptibility to zanamivir [35, 36].



## 361 **DISCUSSION**

362 Metagenomic sequencing has not yet been implemented as routine diagnostic tool in clinical  
363 diagnostics of viral infections. Such application would require the careful definition and  
364 validation of several parameters to enable the accurate assessment of a clinical sample with  
365 regard to the presence or absence of a pathogen, in order to fulfil current accreditation  
366 guidelines. For this purpose, this study has initiated the optimization of several steps  
367 throughout the pre- and post-sequencing workflow, which are considered essential for  
368 sensitive and specific mNGS based virus detection. Many virus discovery or virus diagnostic  
369 protocols have focussed on the enrichment of viral particles [37] with the intention to  
370 increase the relative amount of virus reads. However, these methods are laborious and  
371 intrinsically exclude viral nucleic acid located in host cells. The current protocol enabled high  
372 throughput sample pre-treatment by means of automated NA extraction and without depletion  
373 of bacterial nor human genome, with potential for pan-pathogen detection. Several  
374 adaptations in the bioinformatic script resulted in more accurate classification output  
375 reporting.

376 The addition of an internal control to a PCR reaction is widely used as a quality control of a  
377 qPCR [38]. While the addition of internal controls in mNGS is not yet an accepted standard  
378 procedure, we employed EAV and PhHV1 as an RNA and DNA controls, respectively, as for  
379 diagnostic application such precautions are required. The amount of internal control reads  
380 and target virus reads have been reported to be dependent of the amount of background reads  
381 (negative correlation) [39]. In our protocol, the internal controls were used as qualitative  
382 controls but may be used as indicator of the amount of background. Since the NCBI database  
383 was lacking a complete PhHV1 genome, the Centrifuge index building and classification was  
384 limited to classification on a higher taxonomic rank. In order to achieve classification of  
385 PhHV1 at species level, the whole genome of PhHV1 was sequenced, and based on the  
386 gained sequence reads the genome was build [31]. The proposed almost complete genome of  
387 PhHV1 was added to the NCBI GenBank database.

388 Sensitivity of the mNGS protocol was 86% (25/29) based on PCR target viruses. Four, all  
389 RNA viruses, that were not recovered by mNGS had high Cq values, over 31, i.e. a relatively  
390 low viral load. This may be a drawback of the retrospective nature of this clinical evaluation  
391 as RNA viruses may be degraded due to storage and freeze-thaw steps, resulting in lower  
392 sensitivity of mNGS. A correlation was found between read counts and PCR Cq value,  
393 demonstrating the quantitative nature of viral detection by mNGS. Discrepancies between the  
394 Cq values and the number of mNGS reads may be explained by 1) unrepresentative Cq  
395 values, e.g. by primer mismatch for highly divergent viruses like rhino/enteroviruses and 2)  
396 differences in sensitivity of mNGS for several groups of viruses, as has been reported by  
397 others [42]. Additionally, several viral pathogens were detected that were not targeted by the  
398 routine PCR assays, including influenza C virus, which is typical of the unbiased nature of  
399 the method. In addition, though not within the scope of this study, bacterial pathogens,  
400 including *Bordetella pertussis* (qPCR positive), were also detected. In the current study only  
401 viruses were targeted since these could be well compared to qPCR results, bacterial targets  
402 remain to be studied in clinical sample types more suitable for bacterial detection than  
403 nasopharyngeal washings. The analytical specificity of mNGS appeared to be high, especially  
404 with a cut-off of 15 reads. However, the clinical specificity, the relevance of the lower read  
405 numbers, still needs further investigation in clinical studies.

406 Sequencing using Illumina HiSeq 4000 chemistry resulted in frequent false positive  
407 rhinovirus reads in numerous samples. This problem could be attributed to ‘index hopping’  
408 (index miss-assignment) as earlier described [34]. Although the percentage of reads which  
409 contributed to the index hopping was very low, this is critical for clinical viral diagnostics, as  
410 this is aimed specifically at low abundance targets [34, 40].

411 Bioinformatics classification of metagenomic sequence data with the pipeline Centrifuge  
412 required identification of the optimal parameters in order to minimize miss- and unclassified  
413 reads. Default settings of this pipeline resulted in higher rates of both false positive and false  
414 negative results. The nucleotide database includes a wide variety of unannotated viral

415 sequences, such as partial sequences and (chimeric) constructs, in contrast to the curated and  
416 well-annotated sequences in the NCBI Refseq database, which resulted in a higher  
417 specificity. In addition to the database, settings for the assignment algorithm were adapted as  
418 well. The assignment settings were adjusted to unique assignment in the case of homology to  
419 the lowest common ancestor. This modification resulted in higher sensitivity and specificity  
420 than the default settings, however the ability to further subtyping diminished. This is likely to  
421 be attributed to the limited representation/availability of strain types within the RefSeq  
422 database. In consequence, this leads to a more accurate estimation of the common ancestor  
423 for particular viruses, but limited typing results in case of highly variable ones. To obtain  
424 optimal typing results, additional annotated sequences may be added or a new database  
425 should be build, with a high variety of well-defined and frequently updated virus strain types.

426 To conclude, this study contributes to the increasing evidence that metagenomic NGS can  
427 effectively be used for a wide variety of diagnostic assays in virology, such as unbiased virus  
428 detection, resistance mutations, virulence markers, and epidemiology, as shown by the ability  
429 to detect SNPs in influenza virus.

430 These findings support the feasibility of moving this promising field forward to a role in the  
431 routine detection of pathogens by the use of mNGS. Further optimization should include the  
432 parallel evaluation of adult samples, the inclusion of additional annotated strain sequences to  
433 the database, and further elaboration of the classification algorithm and reporting for clinical  
434 diagnostics. The importance of both negative non-template control samples [41] and healthy  
435 control cases may support the critical discrimination of contaminants and viral ‘colonization’  
436 from clinically relevant pathogens.

437

## 438 **CONCLUSIONS**

439 Optimal sample preparation and bioinformatics analysis are essential for sensitive and  
440 specific mNGS based virus detection.

441 Using a high-throughput genome extraction method without viral enrichment, both RNA and  
442 DNA viruses could be detected with a sensitivity comparable to PCR.

443 Using mNGS, all potential pathogens can be detected in one single test, while simultaneously  
444 obtaining additional detailed information on detected viruses. Interpretation of clinical  
445 relevance is an important issue but essentially not different from the use of PCR based assays  
446 and supported by the available information on typing and relative quantities. These findings  
447 support the feasibility of a role of mNGS in the routine detection of pathogens.

448

#### 449 ACKNOWLEDGEMENTS

450 We thank our project partners Floyd Wittink, Wouter Suring (Hogeschool Leiden), Danny  
451 Duijsings (BaseClear) and Christiaan Henkel (Leiden University). We also like to thank  
452 thank Tom Vreeswijk, Lopje Höcker and Mario van Bussel (KML, LUMC) for help with the  
453 pre-sequencing experiments and Jeroen Laros (Human Genetics, LUMC) for help with the  
454 bioinformatics.

455

#### 456 AUTHOR CONTRIBUTIONS

457 SB, ALR, ECJC, ACMK, and JJCv participated in the study design. SB performed the pre-  
458 library preparation experiments. SB, NP, ECC, RHPV, PH, and HM carried out bioinformatic  
459 analyses. SB, ALR and ECC analyzed the data. SB and ALR wrote the first version of the  
460 manuscript. All authors contributed and revised the manuscript and approved the final  
461 manuscript.

462

#### 463 DISCLOSURE DECLARATION

464 This research is partially funded by GENERADE Centre of Expertise Genomics in Leiden.

465 Competing interests: none declared.

466

467 DATA ACCESS

468 The raw datasets of this study are not publicly made available given the confidential character  
469 of human sequences.

470

471 **REFERENCES**

- 472 1. Lozano R, Naghavi M, Foreman K, Lim S, Shibuya K, Aboyans V, Abraham J, Adair  
473 T, Aggarwal R, Ahn SY *et al*: **Global and regional mortality from 235 causes of**  
474 **death for 20 age groups in 1990 and 2010: a systematic analysis for the Global**  
475 **Burden of Disease Study 2010.** *Lancet (London, England)* 2012, **380**(9859):2095-  
476 2128.
- 477 2. Nair H, Simoes EA, Rudan I, Gessner BD, Azziz-Baumgartner E, Zhang JS, Feikin  
478 DR, Mackenzie GA, Moisi JC, Roca A *et al*: **Global and regional burden of**  
479 **hospital admissions for severe acute lower respiratory infections in young**  
480 **children in 2010: a systematic analysis.** *Lancet (London, England)* 2013,  
481 **381**(9875):1380-1390.
- 482 3. Bates M, Mudenda V, Mwaba P, Zumla A: **Deaths due to respiratory tract**  
483 **infections in Africa: a review of autopsy studies.** *Current opinion in pulmonary*  
484 *medicine* 2013, **19**(3):229-237.
- 485 4. Jain S, Self WH, Wunderink RG, Fakhran S, Balk R, Bramley AM, Reed C, Grijalva  
486 CG, Anderson EJ, Courtney DM *et al*: **Community-Acquired Pneumonia**  
487 **Requiring Hospitalization among U.S. Adults.** *N Engl J Med* 2015, **373**(5):415-  
488 427.
- 489 5. Heikkinen T, Jarvinen A: **The common cold.** *Lancet (London, England)* 2003,  
490 **361**(9351):51-59.
- 491 6. Ieven M, Coenen S, Loens K, Lammens C, Coenjaerts F, Vanderstraeten A,  
492 Henriques-Normark B, Crook D, Huygen K, Butler CC *et al*: **Aetiology of lower**  
493 **respiratory tract infection in adults in primary care: a prospective study in 11**

- 494           **European countries.** *Clinical microbiology and infection : the official publication of*  
495           *the European Society of Clinical Microbiology and Infectious Diseases* 2018.
- 496    7.       Zaki AM, van Boheemen S, Bestebroer TM, Osterhaus AD, Fouchier RA: **Isolation**  
497           **of a novel coronavirus from a man with pneumonia in Saudi Arabia.** *N Engl J*  
498           *Med* 2012, **367**(19):1814-1820.
- 499    8.       Prachayangprecha S, Schapendonk CM, Koopmans MP, Osterhaus AD, Schurch AC,  
500           Pas SD, van der Eijk AA, Poovorawan Y, Haagmans BL, Smits SL: **Exploring the**  
501           **potential of next-generation sequencing in detection of respiratory viruses.**  
502           *Journal of clinical microbiology* 2014, **52**(10):3722-3730.
- 503    9.       Wooley JC, Godzik A, Friedberg I: **A primer on metagenomics.** *PLoS*  
504           *computational biology* 2010, **6**(2):e1000667.
- 505    10.      Hoffmann B, Scheuch M, Hoper D, Jungblut R, Holsteg M, Schirrneier H,  
506           Eschbaumer M, Goller KV, Wernike K, Fischer M *et al*: **Novel orthobunyavirus in**  
507           **Cattle, Europe, 2011.** *Emerging infectious diseases* 2012, **18**(3):469-472.
- 508    11.      Mongkolrattanothai K, Naccache SN, Bender JM, Samayoa E, Pham E, Yu G, Dien  
509           Bard J, Miller S, Aldrovandi G, Chiu CY: **Neurobrucellosis: Unexpected Answer**  
510           **From Metagenomic Next-Generation Sequencing.** *Journal of the Pediatric*  
511           *Infectious Diseases Society* 2017, **6**(4):393-398.
- 512    12.      van Boheemen S, de Graaf M, Lauber C, Bestebroer TM, Raj VS, Zaki AM,  
513           Osterhaus AD, Haagmans BL, Gorbalenya AE, Snijder EJ *et al*: **Genomic**  
514           **characterization of a newly discovered coronavirus associated with acute**  
515           **respiratory distress syndrome in humans.** *mBio* 2012, **3**(6).

- 516 13. Kohl C, Brinkmann A, Dabrowski PW, Radonic A, Nitsche A, Kurth A: **Protocol for**  
517 **metagenomic virus detection in clinical specimens.** *Emerging infectious diseases*  
518 2015, **21**(1):48-57.
- 519 14. Parker J, Chen J: **Application of next generation sequencing for the detection of**  
520 **human viral pathogens in clinical specimens.** *Journal of clinical virology : the*  
521 *official publication of the Pan American Society for Clinical Virology* 2017, **86**:20-26.
- 522 15. Zou X, Tang G, Zhao X, Huang Y, Chen T, Lei M, Chen W, Yang L, Zhu W, Zhuang  
523 L *et al*: **Simultaneous virus identification and characterization of severe**  
524 **unexplained pneumonia cases using a metagenomics sequencing technique.**  
525 *Science China Life sciences* 2017, **60**(3):279-286.
- 526 16. Wylie KM, Mihindukulasuriya KA, Sodergren E, Weinstock GM, Storch GA:  
527 **Sequence analysis of the human virome in febrile and afebrile children.** *PloS one*  
528 2012, **7**(6):e27735.
- 529 17. Loens K, van Loon AM, Coenjaerts F, van Aarle Y, Goossens H, Wallace P, Claas  
530 EJ, Ieven M: **Performance of different mono- and multiplex nucleic acid**  
531 **amplification tests on a multipathogen external quality assessment panel.** *Journal*  
532 *of clinical microbiology* 2012, **50**(3):977-987.
- 533 18. Welsh J, McClelland M: **Fingerprinting genomes using PCR with arbitrary**  
534 **primers.** *Nucleic acids research* 1990, **18**(24):7213-7218.
- 535 19. Altschul SF, Gish W, Miller W, Myers EW, Lipman DJ: **Basic local alignment**  
536 **search tool.** *Journal of molecular biology* 1990, **215**(3):403-410.



- 537 20. Wery M, Describes M, Thermes C, Gautheret D, Morillon A: **Zinc-mediated RNA**  
538 **fragmentation allows robust transcript reassembly upon whole transcriptome**  
539 **RNA-Seq. *Methods (San Diego, Calif)* 2013, 63(1):25-31.**
- 540 21. **New England BioLabs Inc.** [[https://www.neb.com/products/e7420-nebnext-ultra-](https://www.neb.com/products/e7420-nebnext-ultra-directional-rna-library-prep-kit-for-illumina#Product%20Information)  
541 [directional-rna-library-prep-kit-for-illumina#Product%20Information](https://www.neb.com/products/e7420-nebnext-ultra-directional-rna-library-prep-kit-for-illumina#Product%20Information)] Version 8.0.
- 542 22. [<http://biopet-docs.readthedocs.io/en/stable/>]
- 543 23. [<https://www.bioinformatics.babraham.ac.uk/projects/fastqc/>]
- 544 24. Joshi NA, Fass JN: **Sickle: A sliding-window, adaptive, quality-based trimming**  
545 **tool for FastQ files.** 2011.
- 546 25. Martin M: **Cutadapt removes adapter sequences from high-throughput**  
547 **sequencing reads.** *EMBnetjournal* 2011, **17**(10).
- 548 26. Kim D, Song L, Breitwieser FP, Salzberg SL: **Centrifuge: rapid and sensitive**  
549 **classification of metagenomic sequences.** *Genome research* 2016, **26**(12):1721-  
550 1729.
- 551 27. O'Leary NA, Wright MW, Brister JR, Ciufu S, Haddad D, McVeigh R, Rajput B,  
552 Robbertse B, Smith-White B, Ako-Adjei D *et al*: **Reference sequence (RefSeq)**  
553 **database at NCBI: current status, taxonomic expansion, and functional**  
554 **annotation.** *Nucleic acids research* 2016, **44**(D1):D733-745.
- 555 28. Ondov BD, Bergman NH, Phillippy AM: **Interactive metagenomic visualization in**  
556 **a Web browser.** *BMC bioinformatics* 2011, **12**:385.

- 557 29. <https://github.com/biowdl/virus-assembly>
- 558 30. <https://github.com/lh3/seqtk>
- 559 31. Bankevich A, Nurk S, Antipov D, Gurevich AA, Dvorkin M, Kulikov AS, Lesin VM,  
560 Nikolenko SI, Pham S, Prjibelski AD *et al*: **SPAdes: a new genome assembly**  
561 **algorithm and its applications to single-cell sequencing**. *Journal of computational*  
562 *biology : a journal of computational molecular cell biology* 2012, **19**(5):455-477.
- 563 32. Li H: **Aligning sequence reads, clone sequences and assembly contigs with BWA-**  
564 **MEM**, vol. 1303; 2013.
- 565 33. Li H, Handsaker B, Wysoker A, Fennell T, Ruan J, Homer N, Marth G, Abecasis G,  
566 Durbin R: **The Sequence Alignment/Map format and SAMtools**. *Bioinformatics*  
567 (*Oxford, England*) 2009, **25**(16):2078-2079.
- 568 34. Sinha R, Stanley G, Gulati GS, Ezran C, Travaglini KJ, Wei E, Chan CKF, Nabhan  
569 AN, Su T, Morganti RM *et al*: **Index Switching Causes “Spreading-Of-Signal”**  
570 **Among Multiplexed Samples In Illumina HiSeq 4000 DNA Sequencing**. *bioRxiv*  
571 2017.
- 572 35. Orozovic G, Orozovic K, Lennerstrand J, Olsen B: **Detection of resistance**  
573 **mutations to antivirals oseltamivir and zanamivir in avian influenza A viruses**  
574 **isolated from wild birds**. *PloS one* 2011, **6**(1):e16028.
- 575 36. Hsieh NH. Assessing the oseltamivir-induced resistance risk and implications for  
576 influenza infection control strategies. *Infect Drug Resist.* 2017;10:215-226

- 577 37. Hasan MR, Rawat A, Tang P, Jithesh PV, Thomas E, Tan R, Tilley P: **Depletion of**  
578 **Human DNA in Spiked Clinical Specimens for Improvement of Sensitivity of**  
579 **Pathogen Detection by Next-Generation Sequencing.** *Journal of clinical*  
580 *microbiology* 2016, **54**(4):919-927.
- 581 38. Ninove L, Nougairede A, Gazin C, Thirion L, Delogu I, Zandotti C, Charrel RN, De  
582 Lamballerie X: **RNA and DNA bacteriophages as molecular diagnosis controls in**  
583 **clinical virology: a comprehensive study of more than 45,000 routine PCR tests.**  
584 *PloS one* 2011, **6**(2):e16142.
- 585 39. Schlaberg R, Chiu CY, Miller S, Procop GW, Weinstock G: **Validation of**  
586 **Metagenomic Next-Generation Sequencing Tests for Universal Pathogen**  
587 **Detection.** *Archives of pathology & laboratory medicine* 2017, **141**(6):776-786.
- 588 40. van der Valk T, Vezzi F, Ormestad M, Dalen L, Guschanski K: **Estimating the rate**  
589 **of index hopping on the Illumina HiSeq X platform.** *bioRxiv* 2018.
- 590 41. Naccache SN, Hackett J, Jr., Delwart EL, Chiu CY: **Concerns over the origin of**  
591 **NIH-CQV, a novel virus discovered in Chinese patients with seronegative**  
592 **hepatitis.** *Proceedings of the National Academy of Sciences of the United States of*  
593 *America* 2014, **111**(11):E976.
- 594 42. Bal A, Pichon M, Picard C, Casalegno JS, Valette M, Schuffenecker I, Billard L,  
595 Vallet S, Vilchez G, Cheynet V, Oriol G, Trouillet-Assant S, Gillet Y, Lina B,  
596 Brengel-Pesce K, Morfin F, Josset L: **Quality control implementation for universal**  
597 **characterization of DNA and RNA viruses in clinical respiratory samples using**  
598 **single metagenomics next-generation sequencing workflow.** *BMC Infect Dis* 2018:  
599 18(1):537

## TABLES

Table 1. Internal controls EAV/PhHV-1: serial dilutions against a clinical sample background and within-run precision (INFA)

| <b>Sample nr</b> | <b>INFA Cq</b> | <b>EAV Cq</b> | <b>PhHV-1 Cq</b> | <b>INFA reads centrifuge</b> | <b>INFA reads BWA</b> | <b>EAV reads Centrifuge</b> | <b>EAV reads BWA</b> | <b>PhHV-1 reads BWA</b> |
|------------------|----------------|---------------|------------------|------------------------------|-----------------------|-----------------------------|----------------------|-------------------------|
| <b>1</b>         | 24.79          | 30.85         | 32.55            | 8843 (3.9 log)               | 9805                  | 9                           | 72                   | 3302                    |
| <b>2</b>         | 24.76          | 28.45         | 30.33            | 11011 (4.0 log)              | 12570                 | 49                          | 417                  | 3773                    |
| <b>3</b>         | 24.67          | 24.91         | 26.83            | 8525 (3.9 log)               | 9260                  | 520                         | 5130                 | 6664                    |
| <b>4</b>         | 24.52          | 21.59         | 23.52            | 10010 (4.0 log)              | 11384                 | 5634                        | 54366                | 19984                   |

Abbreviations: nr: number, Cq: quantification cycle value, INFA: influenza A, EAV: equine arteritis virus, PhHV-1 phocine herpesvirus 1.

PhHV-1 reads were based on BWA alignment, since the PhHV-1 genome was lacking in the NCBI database

Table 2. Comparison of analysis of 1 million vs 10 million reads.

| virus       | virusfamily      | 10 million reads |            |                    |        | 1 million reads |            |                    |        | % viral |
|-------------|------------------|------------------|------------|--------------------|--------|-----------------|------------|--------------------|--------|---------|
|             |                  | Cq value         | Root reads | virus family reads | % root | % viral         | Root reads | virus family reads | % root |         |
| <b>RV</b>   | Picornaviridae   | 37.7             | 8203894    | 5290               | 0.06   | 84.37           | 822218     | 527                | 0.07   | 86.11   |
| <b>PIV4</b> | Paramyxoviridae  | 24.9             | 10886798   | 3965               | 0.04   | 41.90           | 1088067    | 369                | 0.08   | 40.73   |
| <b>CMV</b>  | Herpesviridae    | 34.5             | 15889428   | 806                | 00.01  | 10.88           | 1588922    | 82                 | 0.04   | 11.87   |
| <b>ADV</b>  | Adenoviridae     | 30.2             | 11146488   | 0                  | 0      | 0               | 1115135    | 0                  | 0.03   | 0       |
| <b>RSV</b>  | Paramyxoviridae  | 27.3             | 10191995   | 2287               | 0.02   | 53.29           | 1019415    | 253                | 0.04   | 59.25   |
| <b>INFB</b> | Orthomyxoviridae | 30               | 8535672    | 804                | 0.01   | 48.67           | 853149     | 75                 | 0.02   | 46.58   |
| <b>NL63</b> | Coronaviridae    | 36.2             | 10386928   | 0                  | 0      | 0               | 1038469    | 0                  | 0.02   | 0       |
| <b>INFA</b> | Orthomyxoviridae | 27.5             | 10981601   | 12539              | 0.11   | 70.28           | 1097872    | 1276               | 0.17   | 69.84   |
| <b>MPV</b>  | Paramyxoviridae  | 34.1             | 12972626   | 3                  | 0      | 0.10            | 1297151    | 0                  | 0.02   | 0       |
| <b>HBOV</b> | Parvoviridae     | 32.2             | 11819805   | 0                  | 0      | 0               | 1181738    | 0                  | 0      | 0       |
| <b>RV</b>   | Picornaviridae   | 23.1             | 11819805   | 50034              | 0.42   | 84.27           | 1183738    | 4912               | 0.49   | 84.25   |

Abbreviations: Cq: quantification cycle value, % root: percentage of total root reads, % viral: percentage of all viral reads , RV: rhinovirus,

PIV4: parainfluenza 4, CMV: cytomegalovirus, ADV: adenovirus, RSV: respiratory syncytial virus, INF: influenza, NL63: coronavirus NL63,

MPV: metapneumovirus, hBoV: human bocavirus

Table 3. Detection of qPCR viruses positive respiratory samples with mNGS

|            |          | Routine diagnostics |           |            | Metagenomic NGS      |        |          |                              |        |         |
|------------|----------|---------------------|-----------|------------|----------------------|--------|----------|------------------------------|--------|---------|
| sample nr. | material | PCR positive        | Cq values | Root reads | Virus genus          | reads  | % root   | Virus species                | reads  | % root  |
| 1          | np wash  | RV                  | 30,7      | 12031393   | Enterovirus          | 0      |          | Rhinovirus                   | 0      |         |
|            |          | PIV1                | 17,1      |            | Respirovirus         | 106218 | 0.9      | Human respirovirus 1         | 106153 | 0.9     |
|            |          | ADV                 | 33,6      |            | Mastadenovirus       | 2      | 0.00002  | Human mastadenovirus C       | 2      | 0.00002 |
| 2          | np wash  | MPV                 | 24        | 12628716   | Metapneumovirus      | 288    | 0.002    | Human metapneumovirus        | 288    | 0.002   |
|            |          | 3                   | BAL       |            | NL63                 | 24,4   | 10928011 | Alphacoronavirus             | 7385   | 0.07    |
| 4          | sputum   | RV                  | 32        | 9906552    | Enterovirus          | 1349   | 0.01     | Rhinovirus B14               | 836    | 0.008   |
|            |          | 5                   | np wash   |            | INFA                 | 22,2   | 12923454 | Influenzavirus A             | 2619   | 0.02    |
| 6          | np wash  | MPV                 | 33,4      | 8950930    | Metapneumovirus      | 4      | 0.00004  | Human metapneumovirus        | 4      | 0.00004 |
|            |          | ADV                 | 19,3      |            | Mastadenovirus       | 685    | 0.004    | Human mastadenovirus C       | 397    | 0.004   |
| 7          | sputum   | PIV4                | 21        | 13045439   | Rubulavirus          | 15066  | 0.1      | Human parainfluenza virus 4a | 15066  | 0.1     |
| 8          | np wash  | HBoV                | 22,3      | 21601343   | Bocaparvovirus       | 8      | 0.00004  | Human bocavirus              | 8      | 0.00004 |
| 9          | np wash  | MPV                 | 22,2      | 14159037   | Metapneumovirus      | 352    | 0.002    | Human metapneumovirus        | 326    | 0.002   |
| 10         | np wash  | INFB                | 16,5      | 9868792    | Influenzavirus B     | 7091   | 0.07     | Influenza B                  | 7091   | 0.07    |
| 11         | np wash  | RV                  | 25,4      | 14291308   | Enterovirus          | 4      | 0.00003  | Rhinovirus A                 | 4      | 0.00003 |
|            |          | RSV                 | 30,7      |            | Orthopneumovirus/RSV | 72     | 0.0005   | Respiratory syncytial virus  | 1      | 0.00000 |
| 12         | np wash  | INFB                | 21,4      | 14580692   | Influenzavirus B     | 5742   | 0.04     | Influenza B virus            | 5742   | 0.04    |
| 13         | np wash  | RSV                 | 17,8      | 19653579   | Orthopneumovirus/RSV | 93260  | 0.5      | Respiratory syncytial virus  | 92504  | 0.5     |
| 14         | np wash  | RV                  | 34,4      | 13659957   | Enterovirus          | 0      |          | Rhinovirus                   | 0      |         |
|            |          | INFB                | 22,6      |            | Influenzavirus B     | 136358 | 1        | Influenza B virus            | 136358 | 1       |

|           |         |      |      |          |                      |       |          |                             |      |          |
|-----------|---------|------|------|----------|----------------------|-------|----------|-----------------------------|------|----------|
| <b>15</b> | BAL     | INFB | 34,8 | 9294798  | Influenzavirus       | 0     |          | Influenza virus             | 0    |          |
|           |         | HBoV | 34,1 |          | Bocaparvovirus       | 0     |          | Bocavirus                   | 0    |          |
| <b>16</b> | np wash | HKU1 | 24,3 | 12998763 | Betacoronavirus      | 2086  | 0.02     | Human coronavirus HKU1      | 2086 | 0.02     |
| <b>17</b> | np wash | RV   | 16,8 | 12377898 | Enterovirus          | 1457  | 0.01     | Rhinovirus A                | 1157 | 0.009    |
| <b>18</b> | np wash | RV   | 27,4 | 10951756 | Enterovirus          | 1     | 0.000009 | Rhinovirus B14              | 1    | 0.000009 |
|           |         | HBoV | 19   |          | Bocaparvovirus       | 610   | 0.006    | Human bocavirus             | 610  | 0.006    |
| <b>19</b> | np wash | INFA | 22,1 | 15885048 | Influenzavirus A     | 1425  | 0.009    | Influenza A virus           | 1425 | 0.009    |
| <b>20</b> | np wash | RSV  | 17,2 | 14168817 | Orthopneumovirus/RSV | 66711 | 0.05     | Respiratory syncytial virus | 241  | 0.002    |
| <b>21</b> | np wash | RV   | 17,7 | 1358038  | Enterovirus          | 2539  | 0.02     | Rhinovirus A                | 2539 | 0.02     |

Abbreviations: NGS: next generation sequencing, nr: number, Cq: quantification cycle value, % root: percentage of total root reads, Np wash: nasopharyngeal wash, BAL: bronchoalveolar lavagae, RV: rhinovirus, PIV parainfluenza, ADV: adenovirus, MPV: metapneumovirus, NL63: coronavirus NL63, HKU1: coronavirus HKU1, INF: influenza , hBoV: human bocavirus, RSV: respiratory syncytial virus

Table 4. Sensitivity and specificity of the mNGS protocol tested, based on PCR target virus, and different cut-off levels for defining a positive result.

|                    | <b>All reads</b> | <b>≥15 reads</b> | <b>≥50 reads</b> |
|--------------------|------------------|------------------|------------------|
| <b>Sensitivity</b> | 86               | 67               | 67               |
| <b>Specificity</b> | 91               | 99               | 100              |



Figure 1. Correlation of Cq value and the number of EAV reads (serial dilutions).

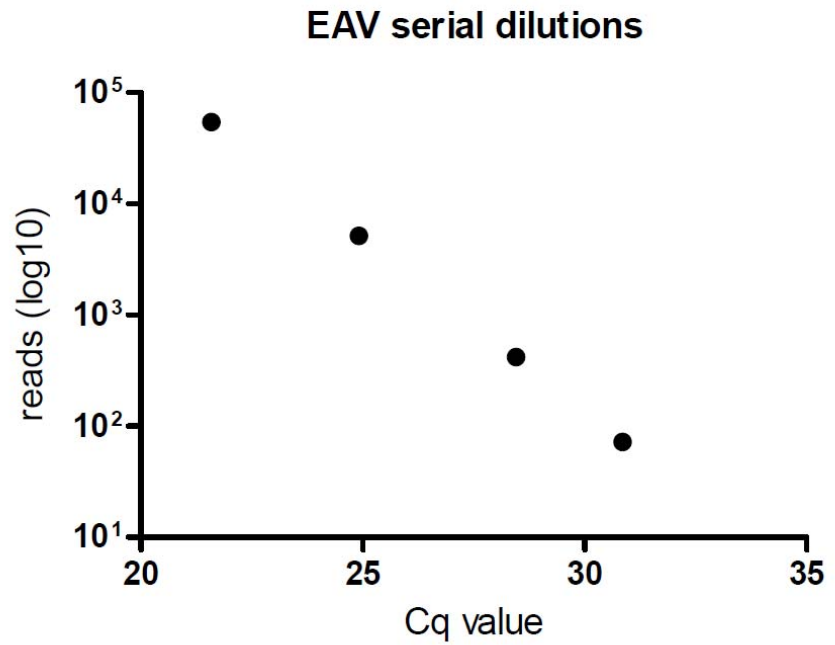

Figure 2. Comparison of fragmentation methods on target reads (species level, log scale).

\*Not tested with Bioruptor setting high intensity.

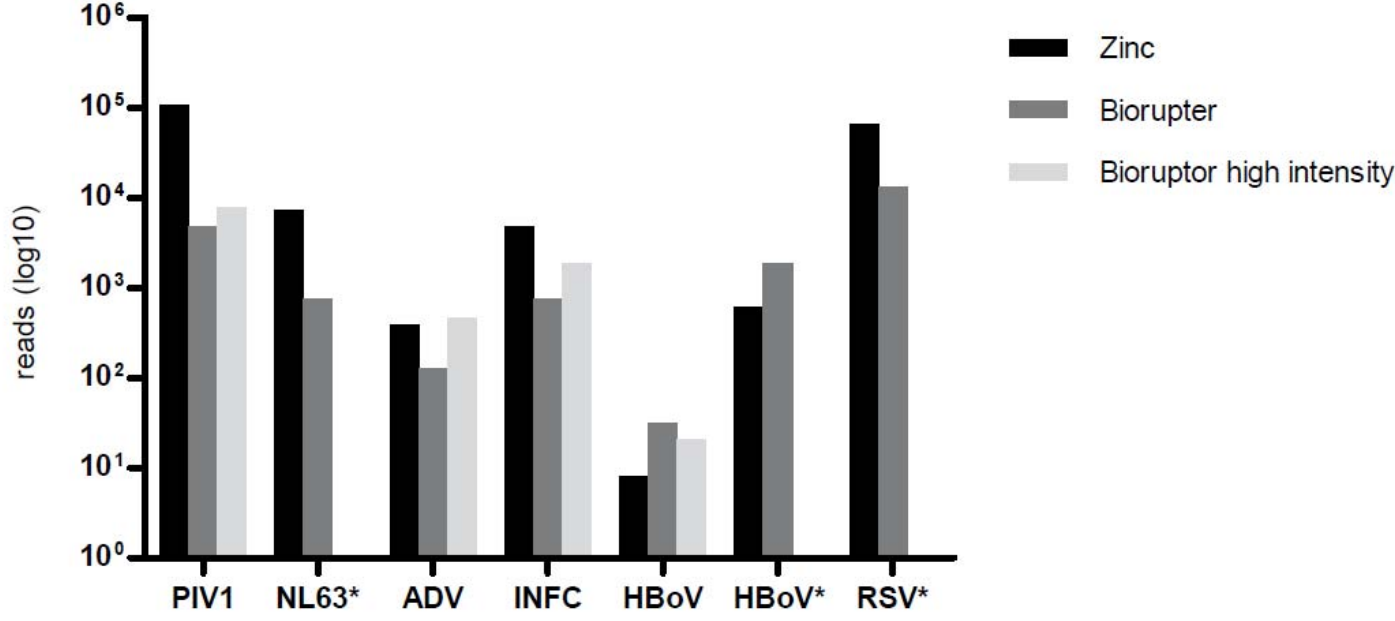

Figure 3. Decline in index hopping (percentages Rhinovirus C of root reads) with Illumina NextSeq 500 as compared to HiSeq 4000. Each line represents one sample.

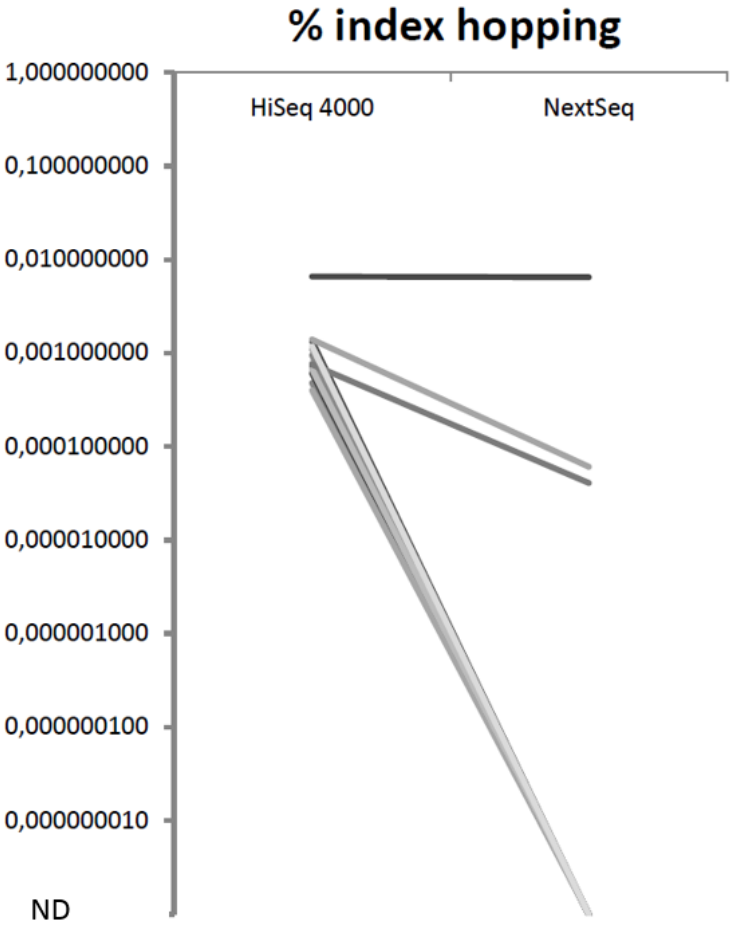

Figure 4. Serial dilutions of an influenza A positive clinical sample.

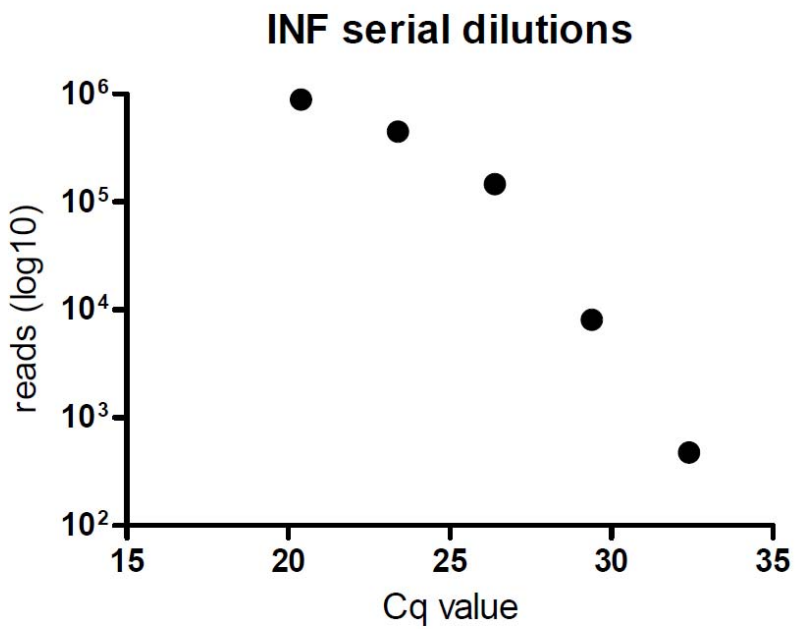

Figure 5. Analysis of in silico simulated EAV reads with the different bioinformatic settings of the Centrifuge pipeline.

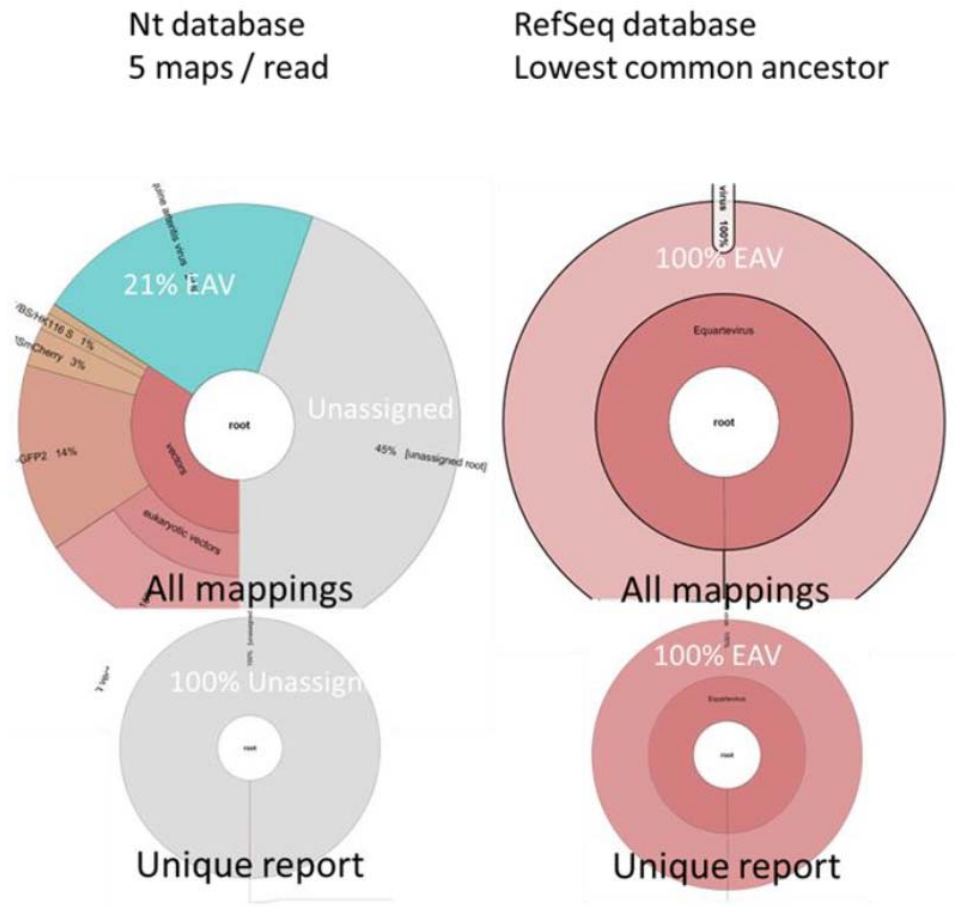

Figure 6. Spurious Lassa virus reads with the NCBI Nucleotide (NT) database versus the RefSeq database. k5; up to 5 labels per sequence.

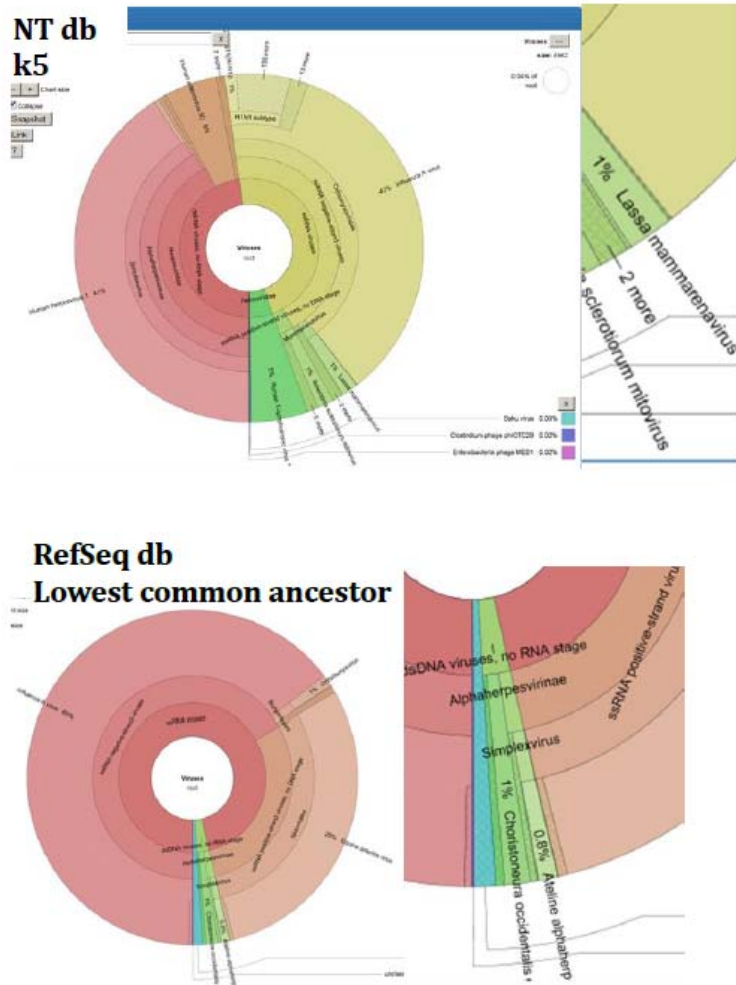

Figure 7. Semi-quantification of the mNGS assay for target virus detection in clinical samples with qPCR confirmed human respiratory viruses.

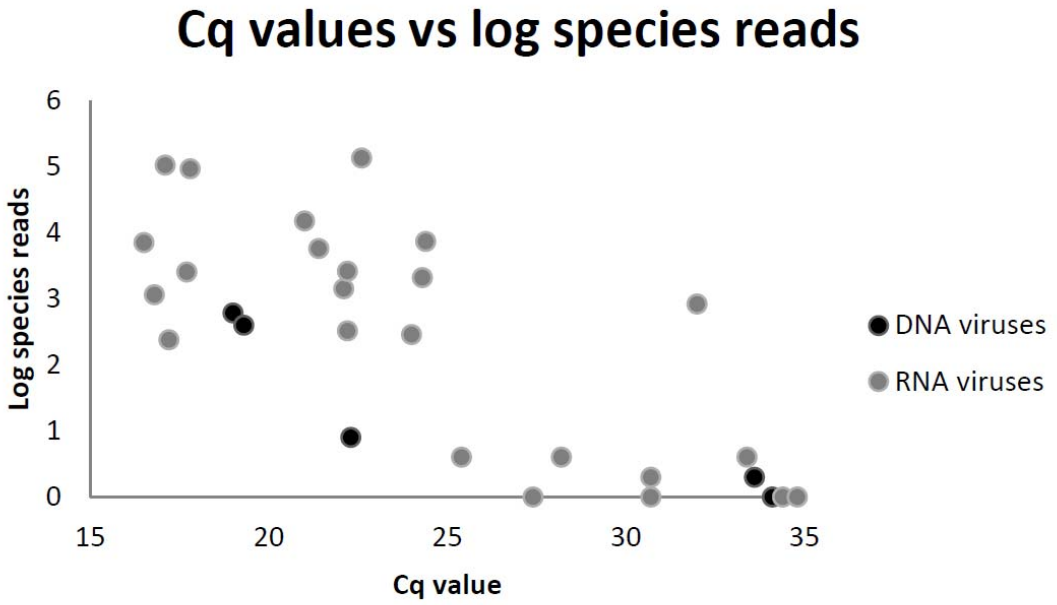

Source: https://www.biorxiv.org/content/10.1101/492835v1.full.pdf
